# Supplementary material for: MAP7 regulates axon morphogenesis by recruiting kinesin-1 to microtubules and modulating organelle transport
Source: eLife journal article supplement (doi:10.7554/elife.36374), 2018-08-22
Supplement: supp [file elife_poa_e36374_Figure_1_source_data_1.xlsx]

## Sheet: C
Figure 1C
	Terminal
EGFP	0	0	2	0	0	0	1	0	0	0	1	0	1	0	1	0	0	2	0	1	0	0	0	0	0	0		0			0		0		0			0			0		0			0
FL	0	0	1	0	0	0	1	0	1	0	0	0	0	0	0	0	0	0	0	0	0	0	0	0	1	1
DC	0	2	1	0	0	1	0	0	1	0	0	0	0	0	0	0	0	0	0	0	0	0	0	1	0	0	0	1	0	0	1	0	0	0	0	0	0	1	5	0	0	0	0	1	0	0
DN	1	0	0	0	0	0	0	0	1	0	1	0	0	0	0	0	0	0	0	1	1	0	0	0	0	1	0	0	1	0	0	1	0	0	0	0	0	0	0
DP	0	0	0	0	0	0	1	1	1	0	1	0	0	0	1	0	0	0	0	0
N	0	0	0	0	0	0	0	0	1	0	0	0	0	0	0	0	0	0	0	0	1	0	0	0	1	0	0	0	1	0	0	0	1	0	0	0	0		0	0	0	0	0	0	0	0	0	0	0
P	0	0	0	0	0	0	0	0	0	0	0	0	0	1	0	0	0	1		1	1		1	0	0	0	0	0	0	0	0	0
C	0	0	0	0	3	0	0	0	0	1	1	0	1	0
[truncated: 58 more columns]

## Sheet: D
Figure 1D
EGFP	FL	DC	DN	DP	N	P	C
256.443	200.173	330.468	469	206.6	322	193	325
278.318	218.802	238.142	462	330.4	253	253	485
238.653	265.728	252.939	594	143.8	391	391	239
238.442	69.8297	146.437	424	224.8	210	210	240
284.796	174.317	173.701	250	344.4	142	142	232
228.046	123.202	160.562	267	141.4	196	196	354
430.299	113.958	300.493	317	213	209	209	124
382.83	71.3135	257.393	384	242.4	217	217	352
407.809	95.1488	107.436	551	493.8	170	365.454	227
273.885	91.5341	202.799	558	244.2	353	439.118	393
347.305	80.7908	136.139	512	326.6	365		390
280.544	111.853	206.318	411	338.2	257		303
227.585	46.8909	197.742	337	318.2	204		343
171.63	110.751	203.282	300	320.8	447		301
252.806	137.345	242.656	280	454.2	448
277.169	144.622	288.187	458	221	663
391.774	192.621	119.379	166	394.4	248
132.622	222.174	285.219	366	203.2	223
104.812	208.807		345	398.4	273
120.888	146.207		355	225.8	440
109.482	139.4		410		211
65.2773			637		296
47.0046			460		209
109.8			351		192
211.576			327		529
164.814			439		175
187.106			664		327
209.71			345		421
215.412			350		209
167.012			310		265.188
197.467			523		171.109
209.505			639		212.15
405.043			290		128.174
495			528		227.62
231			496		236.775
238			536		227.62
384			376		216.57
602			468		218.243
505			415		124.386
394			291		223.516
530			574		102.287
402			540		75.4523
			424		166.058
			496		107.338
			401		65.6656
			518
			620		123.123
			448		223.831
			572		81.4506
			579		116.178
			662		254
			199		475
			200		249
			683		667
			549		129
			390		229
			653		220
			354		412
			361		108
			538		308
			627		456
			367		291
					416
					282
					240
					287
					216
					278
					494
					717
					196
					302
					164
					180
					252
					467.933

## Sheet: E
Figure 1E
FL	DC
92.38	51.46
27.28	34.72
52.39	79.05
20.15	8.68
14.57	11.78
92.38	76.57
27.28	14.26
52.39	81.53
20.15	54.87
14.57	21.08
41.85	5.27
27.28	10.23
51.77	15.81
35.03	19.84
17.67	10.54
35.34	44.33
62	88.04
204.6	29.45
291.71	39.99
76.57	28.83
138.88	16.74
163.37	45.57
73.78	71.61
37.2	74.71
106.64	28.52
24.49	142.29
93	62.31
148.49	16.74
73.47	71.61
24.49	80.91
141.67	64.79
220.1	24.49
46.5	8.37
15.5	77.5
126.17	132.06
181.66	127.1
	29.14
	68.82
	39.99
	21.7
	69.13
	33.17
	115.63
	146.32
	145.7
	110.98
	150.35
	99.82
	102.3
	6.51
	159.65
	9.3
	137.64
	177.01
	111.6
	38.75
	94.55
	28.52
	5.89
	38.13
	31.93
	79.98
	6.82
	6.82
	36.89
	36.89
	20.15
	43.4
	22.32
	67.27
	54.56
	28.21
	34.72
