# Supplementary material for: MAP7 regulates axon morphogenesis by recruiting kinesin-1 to microtubules and modulating organelle transport
Source: eLife journal article supplement (doi:10.7554/elife.36374), 2018-08-22
Supplement: supp [file elife_poa_e36374_Figure_2_source_data_1.xlsx]

## Sheet: Sheet1
Figure 2B
FL	MAP7
100	66.6667
50	100
0	66.6667
0	100
0	100
100	100
0
0	66.6667
100	80
100	33.3333
100
	50
60	0
66.6667	100
80
50	66.6667
50	62.5
76.9231	80
58.3333	42.8571
73.3333	57.1429
71.4286	33.3333
75	40
	50
