# Supplementary material for: MAP7 regulates axon morphogenesis by recruiting kinesin-1 to microtubules and modulating organelle transport
Source: eLife journal article supplement (doi:10.7554/elife.36374), 2018-08-22
Supplement: supp [file elife_poa_e36374_Figure_4_figure_supplement_1_source_data_1.xlsx]

## Sheet: A
Figure 4 - figure supplement 1 A
time	FL								DC
0	0	0	0	0	0	0	0		0	0	0	0	0
5	-7.71803	0.160868	0.743821	1.2614	-0.31096	12.9767	3.14551
10	11.652	1.51309	-1.37689	2.25752	-0.37258	8.00916	1.12272		1.53509	20.3314	2.1751	19.7088	13.9594
15	-10.7748	6.24769	1.16948	4.78048	-0.46915	7.61548	1.09454
20	-4.36779	5.39916	4.15888	5.96151	-0.29658	11.2617	1.4092		0	19.3127	2.75854	30.4828	10.6035
25	0.340376	9.87364	3.37227	6.39039	-0.60642	6.04589	0.655829
30	37.4317	6.92411	4.06651	10.9962	-0.32019	5.94487	0.865429		0	12.2466	3.73556	80.6907	11.6978
35	19.6847	8.53645	4.30213	9.39996	-0.18446	10.4732	-1.09925
40	5.2667	9.86679	-0.47881	7.6429	-0.56738	11.9838	-0.19352		0	34.2565	9.95863	100.296	46.2558
45	30.431	10.353	3.93611	9.08938	0.009449	15.9064	1.13359
50	60.1432	12.9474	3.77907	17.0222	0.195195	15.48	0.906732		0	13.2998	0	93.1455	55.7225
55	53.0439	12.0768	4.99598	11.989	-0.06198	14.2531	3.0852
60	30.5934	12.9441	3.03363	14.9759	0.673949	18.2885	12.6		0	32.4877	4.81469	83.1032	21.0343
65	21.3377	16.6879	5.99254	13.2121	0.049564	14.2869	31.4517
70	25.3822	16.3191	8.9135	18.4662	0.36408	18.4425	29.3072		19.8583	57.3791	39.3211	88.9645	46.4503
75	30.6244	17.0113	0.120959	18.8282	0.432675	13.8151	30.3113
80	20.9145	16.2026	6.3965	23.0037	0.930777	19.8746	9.1127		0	52.2982	44.7286	70.1408	45.393
85	32.8379	21.3143	7.56957	13.4511	0.669905	21.111	7.24556
90	20.8956	17.1499	12.8012	19.8603	1.35123	21.7841	12.0482		7.92296	50.2596	30.6716	19.9054	21.4633
95	12.7949	18.558	4.5609	30.4736	0.364745	25.4065	5.65656
100	9.05941	18.1692	7.28496	19.4022	1.28552	22.5004	8.4064		25.3825	63.3747	34.5816	76.0006	24.3731
105	14.7514	20.2949	7.85501	19.2311	2.33905	23.333	5.09129
110	18.3523	19.4414	7.99379	22.1202	1.68367	26.7266	8.23817		24.1524	59.5304	52.898	78.6053	41.5199
115	23.4117	21.8522	5.74368	21.5225	2.27716	24.9399	1.79215
120	11.7674	18.5943	12.5695	18.4923	1.01941	25.1929	3.09938		27.2227	51.7456	65.6476	66.633	46.7703
125	14.3744	19.9045	10.2205	19.7035	1.79411	20.6688	2.47954
130	38.7541	23.5927	11.3881	21.7842	1.12003	28.2012	6.80447		40.2312	62.0958	60.3352	48.2106	32.9536
135	29.9851	25.7189	15.5068	20.7885	1.54214	26.406	4.94068
140	17.8116	36.5846	11.7761	28.4738	1.39261	27.8533	3.25735		42.2834	66.2792	98.3444	57.5866	53.8336
145	84.8319	27.5979	10.9455	36.1396	1.23514	22.2345	3.54752
150	94.7503	33.063	10.3467	25.1842	2.52869	26.9287	2.93692		30.7353	85.0947	99.3858	70.4138	81.2589
155	79.7207	30.4184	12.7418	37.5696	2.65092	24.2862	1.51035
160	92.933	33.5276	18.0099	31.7168	2.79506	31.7996	2.9991		36.8955	85.0033	81.9378	56.3239	98.4416
165	106.302	32.4557	12.4726	27.568	3.36665	32.1807	3.26409
170	151.978	36.3239	17.392	23.1775	2.3274	34.9393	4.11575		24.8197	77.489	58.7148	90.8166	87.8437
175	94.4136	35.9934	11.092	36.9618	2.0993	33.2096	2.11316
180	78.2781	41.1068	12.1237	37.5153	2.40348	34.0372	1.82769		14.899	90.8209	31.7103	110.447	94.5453
185	51.5713	44.2895	15.1594	47.1972	3.53462	30.9643	4.93276
190	36.8453	51.3475	15.478	27.2943	2.74463	29.4473	3.21811		14.1908	91.4581	44.3216	71.3238	100.376
195	51.698	52.1043	18.8811	30.403	3.12782	30.8203	4.88725
200	46.6659	48.7586	12.1191	34.9144	2.74284	36.2503	5.2753		10.9671	84.7508	62.7409	92.0598	110.486
205	39.6796	50.6031	12.8311	34.622	2.72895	24.6409	6.11114
210	70.6074	49.6251	22.0276	33.9901	2.70859	23.141	4.16808		36.8291	90.592	52.7919	76.8905	124.263
215	78.2004	46.5051	16.361	33.8106	2.62331	30.5968	0.88001
220	63.2735	49.306	20.2632	32.6714	3.13789	21.3121	3.02426		15.7262	99.1215	24.3457	80.7986	107.62
225	76.0733	46.8646	24.0177	35.2412	2.20477	22.1223	2.15085
230	52.2327	40.766	18.7719	43.959	2.67958	22.7913	-0.30078		0.611766	116.48	47.811	60.5171	132.182
235	55.8949	45.1381	17.5886	34.0536	2.67989	23.4933	1.11102
240	51.0209	49.6439	16.2685	54.0684	4.14644	25.6027	1.27601		0	109.503	30.5977	60.2787	138.163
245	58.6266	45.6661	13.9332	36.6743	2.71815	21.3461	2.73227
250	66.5487	48.9774	18.4173	52.3627	2.68999	18.9221	6.55718		14.7181	101.522	61.1909	58.271	150.637
255	67.6105	50.2601	21.745	36.1205	2.94064	13.8141	5.68398
260	73.681	50.7017	17.2764	44.2603	4.49101	11.1924	8.85248		0.974478	102.771	29.1709	62.9047	142.346
265	68.6959	51.8917	21.3421	35.3949	2.91193	16.7327	9.46263
270	62.5062	53.3468	21.2622	39.5507	5.55556	16.0077	8.19173		7.38362	103.053	19.1382	53.9133	129.419
275	59.5713	51.6855	18.6625	36.4133	3.49169	19.1139	4.66085
280	64.5738	55.8186	18.5907	60.4571	5.73126	19.973	5.98615		10.3305	101.317	47.4328	51.3356	101.422
285	73.827	58.1313	27.3347	48.0683	4.27952	18.0021	8.06293
290	91.4299	60.9106	21.8444	23.1986	4.83664	16.6413	5.98877
295	85.7644	62.1009	28.5538	17.3839	6.05511	19.5278	7.45457		2.0694	112.55	44.5525	39.4335	92.1534
blue data points are excluded

## Sheet: B
Figure 4 - figure supplement 1 B
time (s)	DP												DN
0	0	0	0	0	0	0	0	0	0	0	0	0	0	0	0	0	0	0	0	0	0	0
2	18.4753	-0.17962	15.346	51.476	1.86757	20.2281	23.5728	15.5619	5.03087	19.4139	4.12778	44.9976	4.65979	21.5149	-5.49462	-3.92864	-9.02899	2.72108	1.20509	6.25278	11.9852	0.51596
4	28.843	-3.7813	8.87673	19.377	4.77719	69.0258	49.3039	18.0309	7.65149	45.7046	6.53184	73.7738	1.51391	-8.63648	4.5871	14.9404	-4.66232	14.3674	1.03251	7.77611	28.4817	2.3859
6	39.6549	23.5899	15.8297	60.1992	15.237	26.8252	41.7957	19.5931	1.58457	46.734	18.0318	72.9699	2.22914	47.5993	4.50673	15.5277	-11.2361	-0.0231	10.9969	11.9928	20.907	0.748964
8	40.5403	44.2231	14.9737	75.7492	35.8892	142.383	66.5798	32.6667	2.0352	45.6002	21.7377	70.2797	5.6193	67.1637	9.92794	22.8505	-11.6104	3.18227	3.51255	6.72016	24.5684	-1.41722
10	48.8113	39.3504	23.4444	114.036	44.9005	136.725	47.9308	37.7701	1.01443	31.1913	22.6145	146.976	3.41873	75.0726	17.4864	22.1135	-0.29398	13.2374	3.4053	15.4622	17.176	5.03401
12	52.8666	30.5174	25.2904	110.636	46.0678	137.399	62.9203	43.4063	-0.0644	50.7346	27.7417	140.611	5.48798	66.5696	20.4989	21.952	0.891807	26.1514	4.94931	13.8562	22.8092	15.4784
14	65.1263	16.9767	12.8082	109.078	45.7086	6.28071	51.0232	49.0443	0.655842	45.1481	22.6874	178.341	5.4487	52.9698	24.4148	24.3195	4.32648	25.7068	11.86	18.4787	41.5923	16.3209
16	71.1694	27.5283	5.39466	147.906	41.0256	52.8995	52.6919	54.5905	9.67882	50.3481	22.9016	160.154	6.27407	57.6365	29.8601	23.6137	-3.50016	29.4267	12.754	22.4854	29.943	17.1942
18	67.8782	32.8113	7.52707	125.949	43.7822	105.035	81.738	54.0222	12.2612	54.4863	26.6617	183.734	6.7184	41.8957	31.61	-1.10437	0.647633	24.7389	11.3112	21.1235	14.6548	10.3336
20	73.2186	40.3542	26.0663	116.074	41.7654	39.2006	87.7997	66.6951	-0.54513	50.7358	34.0278	188.503	2.91803	18.9629	36.6317	6.53364	6.92753	20.7953	12.367	28.2467	21.2362	15.2792
22	74.7388	38.7953	9.89443	59.6218	50.3258	46.7348	101.941	63.9282	161.499	24.4222	32.102	176.964	2.26518	27.2366	33.657	11.0235	6.67577	13.6491	16.0041	25.7997	29.4666	16.7404
24	72.6335	38.8948	6.72454	105.058	64.6579	-38.5039	71.1686	69.1178		10.9771	28.4033	190.944	4.62192	48.4527	34.1032	13.9867	34.5788	23.0614	16.7401	30.4781	12.0884	21.4214
26	75.5923	71.465	5.43498	48.7379	89.5183	9.15413	75.6526	71.1359	120.418	17.6282	28.2393	191.155	6.25998	63.1149	42.9855	12.8708	49.388	15.1643	16.7545	37.1307	7.10226	31.4784
28	77.6332	82.2902	25.9154	4.19492	91.8511	54.5367	77.6149	86.3394	130.888	8.651	19.4075	185.59	5.57548	30.7612	42.3901	12.5505	56.766	12.3163	19.0527	29.1375	14.4455	19.6028
30	68.8559	46.7551	24.7443	-42.5529	83.8404	93.3289	87.8	75.3376	153.765	20.1441	36.4944	253.458	6.90633	60.5527	32.8426	13.7894	71.021	19.8918	23.5214	18.8406	17.4778	31.4758
32	76.1214	50.1294	28.8112	-27.3895	69.9206	102.221	66.3354	73.0259	103.947	-0.24892	32.5795	232.412	1.27836	54.8585	32.4391	9.19084	62.2062	35.6841	21.3442	26.5085	17.6582	39.9739
34	76.6996	45.3037	20.404	-10.6406	89.6618	52.7508	66.4625	55.9693	135.386	11.5982	26.7101	268.722	0.517979	35.2035	30.7057	15.4039	63.8153	80.9367	22.1856	24.9378	18.5479	50.8091
36	80.1372	59.0198	18.9096	14.268	108.349	83.8904	48.8653	58.7903	64.673	9.68654	44.9055	265.509	6.26659	74.4118	18.5836	7.73672	65.1321	54.4364	27.9739	32.7089	21.6479	56.1127
38	79.9237	62.0518	-3.31165	-7.11547	111.938	290.817	51.5829	63.0708	32.2716	21.822	23.5609	254.353	7.31444	120.309	18.4271	8.49892	58.1132	51.8636	22.5673	20.385	18.2119	56.4908
40	76.7685	48.731	15.676	5.4139	100.473	120.094	45.4282	63.8856	72.0953	15.4934	27.7188	192.374	3.16911	137.245	14.8517	10.051	63.4391	65.8523	30.6891	18.1734	19.25	45.079
42	75.7352	49.6852	20.1799	-9.09784	98.3769	155.967	36.7147	69.7049	110.804	17.048	46.9702	135.389	0.218374	154.809	17.0739	9.68275	62.185	66.433	26.9535	37.5925	12.5827	41.2502
44	82.3245	46.3285	37.3062	33.528	94.9782	100.923	33.6686	61.3198		26.9366	49.9682	105.218	0.772768	172.698	26.993	10.8685	76.5966	79.3246	29.1533	36.1304	14.3012	44.2278
46	85.286	82.4894	-0.89484	7.13604	81.0894	265.795	32.4812	61.3997		22.6633	55.8525	100.665	3.65672	148.368	29.5414	4.6081	81.0286	92.14	27.8111	38.1392	11.8527	35.6087
48	88.8395	74.925	-2.86753	1.39177	98.9006	187.635	48.4668	60.1484		20.0141	58.6671	125.352	7.64029	166.025	32.2776	5.66256	96.986	90.2038	27.5977	19.0359	11.9173	54.5049
50	92.658	70.0448	0.543661	32.445	86.2806	214.194	34.5778	70.8129		-2.31884	46.4354	128.206	9.38513	264.855	34.9434	5.90928	84.5611	94.276	45.0767	17.0867	2.84767	45.0752
52	86.2424	115.433	8.5051	29.755	84.0387	355.485	40.171	77.5736		-6.15582	41.5621	128.554	12.3588	334.829	29.2244	4.46598	89.6231	78.5803	37.9538	12.6604	10.0491	14.1197
54	93.1258	127.494	6.89738	21.0244	82.0711	416.215	23.7891	69.1888		-5.46723	43.4308	141.902	7.96159	361.368	30.6683	7.99824	91.8913	100.831	39.0736	15.8252	4.54615	33.5023
56	86.2831	157.329	23.4253	-22.8399	89.8261	433.629	17.3205	81.1093		4.03014	43.9666	135.768	9.71045	311.34	39.3223	9.88186	80.3762	88.1251	48.2889	20.0122	-4.44443	29.4045
58	87.0678	125.43	28.0937	-7.81648	113.174	300.807	26.7148	90.6315		-11.0241	46.8595	88.2018	7.75148	231.588	43.1795	2.83448	93.6162	103.111	44.1144	22.4542	5.25665	20.2391
60	91.1144	131.794	22.8679	51.6299	146.871	417.781	33.8792	79.0964		-0.43304	44.4755	59.9116	5.68308	187.02	48.5389	3.14683	93.5832	107.659	53.3349	20.9174	15.9466	34.1174
62	91.1006	118.537	32.4213	30.5975	185.622	453.963	27.0535	67.7675		-25.6622	43.2258	54.5721	6.3057	173.38	46.7006	3.34676	37.2427	94.7014	54.4648	20.6902	24.1122	26.9606
64	92.7906	114.542	23.8237	26.8168	193.171	302.334	26.7146	50.258		-4.36872	35.883	45.1402	6.87639	177.567	44.7623	0.765958	30.6724	110.17	47.8837	17.9023	12.2761	39.4616
66	84.486	147.71	27.433	37.8926	132.612	395.856	22.3371	62.4002		-1.09995	32.4861	58.7972	6.35424	223.699	43.2007	2.82517	33.7098	125.254	51.7519	24.3051	-9.27811	39.6158
68	80.513	156.779	22.2804	26.147	157.562	183.946	32.4559	54.4825		-2.15603	17.4798	73.4343	5.84262	222.241	46.6727	2.34326	30.3879	106.84	56.1046	20.2975	-8.22792	42.574
70	86.0706	106.187	19.4265	40.2389	119.941	414.188	37.1803	63.4419		-16.878	27.4827	125.313	1.07174	200.386	13.9316	3.13924	30.7384	125.667	72.9543	29.2848	0.542776	35.2696
72	91.0845	90.3714	22.0977	56.922	141.352	151.658	24.4494	65.3309		-11.9714	23.8434	112.573	0.404234	205.686	33.327	3.1333	30.5108	121.987	66.384	32.6341	6.56389	27.1363
74	82.5781	81.9023	13.8933	29.8717	143.7	252.236	25.1374	68.6979		-8.89477	32.8628	159.399	-2.11985	217.821	58.7469	6.34619	38.3588	97.6765	76.7147	31.1492	0.231678	29.7312
76	74.3717	74.4331	17.6909	42.9478	133.353	86.8191	25.7797	60.9376		-27.2275	20.4218	129.483	-6.09538	262.085	41.5773	15.1977	30.3882	102.33	77.8966	26.3702	112.064	28.9474
78	79.3244	76.3946	20.0792	12.2834	138.56	145.951	17.6644	68.0289		-26.4657	17.2979	170.662	-2.09661	237.07	52.9711	9.67795	33.1856	95.9729	79.2318	34.02	106.901	34.9555
80	84.3186	88.8798	12.9682	18.5998	83.289	99.9491	15.6182	52.4122		-27.3539	32.1904	131.282	-0.60995	221.367	55.211	7.69448	26.8576	102.077	69.1656	30.0316	142.503	41.2439
82	88.4379	81.4709	9.51145	34.5252	100.643	-27.4588	10.7699	59.2517		-18.7413	28.2044	132.412	-8.23875	230.816	50.7088	8.79912	27.8306	89.743	71.3018	33.187	115.824	37.4004
84	94.2342	78.467	20.9976	36.8312	124.307	-53.9423	-8.05855	44.9577		-30.602	32.8427	227.327	-7.45135	133.533	49.349	8.26985	24.339	67.4952	76.2999	26.2614	111.55	42.8663
86	87.211	78.6888	24.3003	54.6468	118.84	-19.0062	-9.07366	65.3178		-20.7086	26.2087	285.864	-12.2198	89.7043	56.178	9.45832	25.6645	66.7726	76.9118	19.963	113.651	34.8565
88	83.7921	81.2523	16.9861	42.0162	91.5451	-76.8816	-0.30941	64.6711		-17.7231	25.278	208.483	-13.1831	99.4312	49.836	10.5897	35.5131	78.5741	67.7973	27.4508	148.881	36.8199
90	83.8077	102.5	31.0378	59.0111	75.5603	-45.0239	10.256	54.4033		24.3866	40.7213	208.165	-12.3842	91.7057	56.1713	10.2656	35.3178	85.1464	66.3291	35.9472	151.901	30.2733
92	86.3023	144.459	32.1276	98.8934	86.3222	-40.8553	-1.07005	71.0062		35.0669	48.6481	212.068	-10.4451	131.688	35.8547	9.57911	37.5755	82.1321	74.7503	43.753	129.338	31.0763
94	86.5391	123.033	23.3485	81.4997	105.732	31.8004	1.4444	54.237		36.8686	34.7797	169.882	-10.2029	124.433	36.4911	8.03915	41.0151	83.3268	76.2377	42.7231	87.4921	29.922
96	87.5643	106.528	21.8124	84.2522	127.925	-15.8247	-5.62603	48.2814		4.82237	47.786	158.732	-5.20228	157.149	31.4903	8.00355	44.7861	86.3112	99.2542	34.2761	114.667	36.9878
98	76.1498	93.4891	37.5465	117.636	150.494	-26.4705	-8.2074	39.4445		25.2992	53.5714	157.438	-3.30093	163.26	34.6005	8.37585	44.5119	82.1145	104.229	39.2273	105.783	35.6381
100	74.2333	122.27	25.6911	73.4287	124.814	74.2634	-12.0056	42.1662		11.9912	60.973	141.608	-4.05956	196.914	24.4501	6.79667	35.1188	95.9662	108.887	36.8668	118.138	38.9359
blue data points are excluded

## Sheet: C
Figure 4 - figure supplement 1 C
	DP			DN
	mean	SEM	N	mean	SEM	N
	0.1196	0.03559	564	0.01967	0.007062	449

## Sheet: D
Figure 4 - figure supplement 1 D
	DP			DN
	mean	SEM	N	mean	SEM	N
	72.9	3.475	564	79.46	14.84	449
