# Supplementary material for: MAP7 regulates axon morphogenesis by recruiting kinesin-1 to microtubules and modulating organelle transport
Source: eLife journal article supplement (doi:10.7554/elife.36374), 2018-08-22
Supplement: supp [file elife_poa_e36374_Figure_4_source_data_1.xlsx]

## Sheet: B
Figure 4B
time (s)	N											P											FL
0	0	0	0	0	0	0	0	0	0	0	0
1	65.1471	37.4095	14.0944	-12.8422	37.2174	88.6984	7.06443	0.691106	11.6738	19.7239	16.6869
2	148.827	37.1878	17.7859	-0.89768	88.1307	48.2442	15.4664	2.37839	10.7511	44.9561	26.7274
3	99.9699	31.4418	39.2592	9.17723	84.6137	84.1981	6.76417	-5.99816	17.1806	50.5057	28.8327
4	137.002	43.5947	47.972	38.9434	77.463	86.1296	13.2623	8.75549	26.6275	48.4357	27.766
5	54.7135	39.2044	50.3582	57.9229	146.243	69.9805	12.2326	0.07127	30.3483	50.164	25.2129
6	173.691	43.1256	55.0258	71.0328	41.0532	92.3749	15.2329	15.1316	30.1456	45.2348	54.5103
7	68.3818	35.2168	68.329	58.1394	47.7648	81.7971	15.2581	28.9726	64.4404	66.6394	28.1084
8	96.7266	61.0923	69.1999	87.1348	17.0781	62.8139	32.2469	15.2373	65.903	50.3956	48.5884
9	182.803	80.9885	57.8422	83.5226	85.9747	61.9937	-1.72056	17.0949	52.4001	48.4747	37.7403
10	201.973	67.785	95.0392	63.2877	31.0876	137.176	15.7507	3.51931	44.4096	60.1985	43.1336
11	187.525	49.8804	66.4962	34.5608	46.8278	97.106	-2.46968	48.7978	97.8637	50.3956	43.4222
12	226.032	53.3916	89.1977	61.9599	18.4182	134.151	12.8643	-0.69717	56.4104	44.5827	59.7061
13	137.764	46.0226	76.2743	33.7255	60.6531	41.9324	9.58726	90.2398	136.222	50.742	52.7034
14	221.314	47.3168	84.1959	60.7459	54.1746	37.313	33.7649	11.2595	58.3743	54.5601	35.4486
15	85.0168	39.426	76.4177	50.2525	53.5404	44.7546	18.0207	94.0655	113.751	46.9521	51.9553
16	195.053	39.6944	92.0004	46.1829	18.1631	82.4871	30.1637	21.3159	85.6961	43.6257	62.6251
17	150.649	35.7279	94.1597	48.1703	42.3045	147.296	8.23897	56.0991	131.415	54.022	59.356
18	146.636	40.026	82.8245	40.3751	15.5817	170.412	27.5828	17.3302	103.15	55.6512	67.4859
19	83.8103	13.8842	78.8877	37.8703	148.684	124.123	13.509	29.93	111.385	49.9315	46.4614
20	88.1082	24.8446	64.333	52.2737	-7.56351	125.965	-2.55438	41.3507	145.342	65.0762	26.1974
21	125.628	26.5708	74.8152	38.9941	40.1336	187.256	19.8282	6.85149	90.7373	78.0152	22.0695
22	186.393	57.4213	71.4667	30.8076	33.1029	105.759	25.1794	79.9457	161.025	87.135	14.5929
23	82.4704	58.3172	75.5715	51.0479	68.1051	62.9494	29.5133	20.9773	102.225	83.678	35.8169
24	201.637	61.6576	87.5951	41.1169	64.5276	148.577	35.9117	66.102	133.994	90.0443	7.57221
25	178.94	51.4064	83.7822	39.9237	75.752	146.033	42.909	41.9719	160.11	81.5686	11.5893
26	198.239	83.2114	99.1876	61.6079	38.9806	149.89	34.3299	31.0276	115.058	100.665	6.20556
27	194.01	106.752	99.4446	55.0504	47.9257	132.132	15.9308	60.9832	162.306	102.517	13.5309
28	206.709	76.5494	113.478	79.1684	4.48602	169.314	24.9987	58.9106	148.945	89.6271	11.3155
29		77.9951	118.998	64.0116	44.288		17.7286	44.9703	138.522	97.1332	24.767
30				93.2173
												P											FL
0																							0	0	0	0	0	0	0
5																							-7.71803	0.160868	0.743821	1.2614	-0.31096	12.9767	3.14551
10																							11.652	1.51309	-1.37689	2.25752	-0.37258	8.00916	1.12272
15																							-10.7748	6.24769	1.16948	4.78048	-0.46915	7.61548	1.09454
20																							-4.36779	5.39916	4.15888	5.96151	-0.29658	11.2617	1.4092
25																							0.340376	9.87364	3.37227	6.39039	-0.60642	6.04589	0.655829
30																							37.4317	6.92411	4.06651	10.9962	-0.32019	5.94487	0.865429
35																							19.6847	8.53645	4.30213	9.39996	-0.18446	10.4732	-1.09925
40																							5.2667	9.86679	-0.47881	7.6429	-0.56738	11.9838	-0.19352
45																							30.431	10.353	3.93611	9.08938	0.009449	15.9064	1.13359
50																							60.1432	12.9474	3.77907	17.0222	0.195195	15.48	0.906732
55																							53.0439	12.0768	4.99598	11.989	-0.06198	14.2531	3.0852
60																							30.5934	12.9441	3.03363	14.9759	0.673949	18.2885	12.6
65																							21.3377	16.6879	5.99254	13.2121	0.049564	14.2869	31.4517
70																							25.3822	16.3191	8.9135	18.4662	0.36408	18.4425	29.3072
75																							30.6244	17.0113	0.120959	18.8282	0.432675	13.8151	30.3113
80																							20.9145	16.2026	6.3965	23.0037	0.930777	19.8746	9.1127
85																							32.8379	21.3143	7.56957	13.4511	0.669905	21.111	7.24556
90																							20.8956	17.1499	12.8012	19.8603	1.35123	21.7841	12.0482
95																							12.7949	18.558	4.5609	30.4736	0.364745	25.4065	5.65656
100																							9.05941	18.1692	7.28496	19.4022	1.28552	22.5004	8.4064
105																							14.7514	20.2949	7.85501	19.2311	2.33905	23.333	5.09129
110																							18.3523	19.4414	7.99379	22.1202	1.68367	26.7266	8.23817
115																							23.4117	21.8522	5.74368	21.5225	2.27716	24.9399	1.79215
120																							11.7674	18.5943	12.5695	18.4923	1.01941	25.1929	3.09938
125																							14.3744	19.9045	10.2205	19.7035	1.79411	20.6688	2.47954
130																							38.7541	23.5927	11.3881	21.7842	1.12003	28.2012	6.80447
135																							29.9851	25.7189	15.5068	20.7885	1.54214	26.406	4.94068
140																							17.8116	36.5846	11.7761	28.4738	1.39261	27.8533	3.25735
145																							84.8319	27.5979	10.9455	36.1396	1.23514	22.2345	3.54752
150																							94.7503	33.063	10.3467	25.1842	2.52869	26.9287	2.93692
155																							79.7207	30.4184	12.7418	37.5696	2.65092	24.2862	1.51035
160																							92.933	33.5276	18.0099	31.7168	2.79506	31.7996	2.9991
165																							106.302	32.4557	12.4726	27.568	3.36665	32.1807	3.26409
170																							151.978	36.3239	17.392	23.1775	2.3274	34.9393	4.11575
175																							94.4136	35.9934	11.092	36.9618	2.0993	33.2096	2.11316
180																							78.2781	41.1068	12.1237	37.5153	2.40348	34.0372	1.82769
185																							51.5713	44.2895	15.1594	47.1972	3.53462	30.9643	4.93276
190																							36.8453	51.3475	15.478	27.2943	2.74463	29.4473	3.21811
195																							51.698	52.1043	18.8811	30.403	3.12782	30.8203	4.88725
200																							46.6659	48.7586	12.1191	34.9144	2.74284	36.2503	5.2753
205																							39.6796	50.6031	12.8311	34.622	2.72895	24.6409	6.11114
210																							70.6074	49.6251	22.0276	33.9901	2.70859	23.141	4.16808
215																							78.2004	46.5051	16.361	33.8106	2.62331	30.5968	0.88001
220																							63.2735	49.306	20.2632	32.6714	3.13789	21.3121	3.02426
225																							76.0733	46.8646	24.0177	35.2412	2.20477	22.1223	2.15085
230																							52.2327	40.766	18.7719	43.959	2.67958	22.7913	-0.30078
235																							55.8949	45.1381	17.5886	34.0536	2.67989	23.4933	1.11102
240																							51.0209	49.6439	16.2685	54.0684	4.14644	25.6027	1.27601
245																							58.6266	45.6661	13.9332	36.6743	2.71815	21.3461	2.73227
250																							66.5487	48.9774	18.4173	52.3627	2.68999	18.9221	6.55718
255																							67.6105	50.2601	21.745	36.1205	2.94064	13.8141	5.68398
260																							73.681	50.7017	17.2764	44.2603	4.49101	11.1924	8.85248
265																							68.6959	51.8917	21.3421	35.3949	2.91193	16.7327	9.46263
270																							62.5062	53.3468	21.2622	39.5507	5.55556	16.0077	8.19173
275																							59.5713	51.6855	18.6625	36.4133	3.49169	19.1139	4.66085
280																							64.5738	55.8186	18.5907	60.4571	5.73126	19.973	5.98615
285																							73.827	58.1313	27.3347	48.0683	4.27952	18.0021	8.06293
290																							91.4299	60.9106	21.8444	23.1986	4.83664	16.6413	5.98877
295																							85.7644	62.1009	28.5538	17.3839	6.05511	19.5278	7.45457
												P
0												0	0	0	0	0	0	0	0	0
2												5.14445	7.17527	16.7829	0.939597	5.03571	14.5861	1.95405
4												5.92386	7.46054	2.48154	1.28672	10.7091	22.512	-2.36616
6												10.4824	5.73478	-0.15997	9.81511	8.33654	-0.78843	0.277252
8												2.82843	11.6623	4.86535	-0.33758	32.5603	20.2657	2.43918
10												10.2041	24.0465	3.62024	14.3431	29.1623	13.5277	8.83376	8.53192	-0.02306
12												10.1877	20.5595	1.15816	7.96967	39.8576	13.5415	8.62238
14												18.218	20.5472	14.9264	21.6138	49.9527	25.345	11.9836
16												14.9165	25.7255	7.04998	16.8664	47.115	15.7451	7.43471
18												22.7572	38.2097	4.93846	30.3667	69.7245	29.5173	12.8472
20												22.6713	38.9012	15.6823	20.533	77.7645	19.1551	6.79571	8.03411	9.50746
22												28.5457	45.5745	20.1551	33.6032	72.8577	35.6695	7.63503
24												22.6409	53.9646	29.4366	20.9645	72.6743	138.769	11.9212
26												23.908	53.2192	32.3119	31.8426	94.217	41.056	6.80333
28												24.7689	53.7316	14.228	29.5372	84.9102	40.7755	15.6417
30												22.4676	59.8714	56.7952	50.023	88.9241	29.5032	18.5299	17.1684	14.7282
32												19.9253	60.8698	26.7844	33.7527	86.037	28.7462	22.5673
34												25.5522	62.4515	15.1905	49.2375	91.8606	26.8262	15.67
36												25.8326	67.7722	18.1593	48.6116	100.382	39.9098	11.7305
38												27.0036	64.6616	16.1272	47.5506	112.943	42.4503	23.238
40												31.5751	59.3744	27.8022	35.3817	110.755	53.7529	25.5499	27.7282	22.1194
42												32.353	64.7493	13.1909	42.5494	99.9972	49.8019	20.7189
44												28.7087	61.929	22.2838	41.6478	130.742	43.0993	17.1054
46												28.8233	65.8472	14.3608	49.6284	137.751	44.9928	20.4351
48												27.7217	73.067	17.1354	30.6953	118.157	33.0055	21.0934
50												29.9289	68.5838	18.0026	55.919	125.071	39.553	22.9182	27.9322	13.2641
52												28.318	69.1122	10.9209	43.246	126.888	42.8374	20.976
54												27.0118	63.7545	23.5591	52.9807	116.941	42.3178	23.1845
56												29.0933	66.6241	24.011	36.5485	132.682	38.3569	33.7196
58												33.0476	66.1629	20.1438	55.934	138.737	48.9807	36.111
60												32.0236	71.7246	14.4556	53.3888	126.215	61.3954	30.9924	35.4185	25.0447
62												33.9787	71.2508	19.834	61.2313	124.265	81.7516	27.9063
64												36.7418	66.7258	16.3829	44.5254	143.799	91.068	23.8117
66												35.3826	80.3713	23.5524	52.2325	145.484	81.093	25.8158
68												38.4043	73.6495	14.1678	52.4522	144.754	77.3982	29.4045
70												44.8536	77.9519	12.7628	52.9415	136.822	69.803	35.7283	27.2753	31.0476
72												45.9192	74.0375	6.34184	46.9891	142.795	186.784	17.2712
74												46.0272	74.0342	20.8106	56.8907	144.976	216.518	14.9316
76												39.4737	81.5274	21.7375	55.4205	139.991	236.32	3.99711
78												38.7983	81.4485		48.8749	122.508	194.086	20.0897
80												37.5208	71.2333		51.3533	131.871	282.407	20.5353	33.6854	38.0412
82												31.6029	84.2864		57.5838	124.289	245.239
84												33.2135	78.9225		46.6247	102.603	135.773
86												33.9712	82.9276		62.3646	122.692	104.918
88												42.7817	85.7646		40.3776	141.446	87.7725
90												35.3589	81.3783		54.5217	133.311	96.032		34.0737	37.677
92												36.6205	86.6932		53.7184	128.035	91.1481
94												36.9586	84.4446		61.3387	111.721	97.8374
96												36.628	79.0188		67.2896	144.799	88.6942
98												40.5587	75.0212		61.9809	102.618	75.0007
100												48.1253	72.4371		60.4021	124.24	73.4227		43.6657	45.0254
102												49.1058	85.6276		65.8401	72.858	92.0678
104												51.3618	86.5976		48.4054	135.784	81.6708
106												54.8623	83.3245		67.48	136.223	70.3646
108												62.2456	96.2255		58.063	95.5994	70.5375
110												45.1608	79.0787		67.5706	111.763	82.4823		35.377	59.906
112												75.2559	92.6675		66.434	121.979	76.7686
114												53.3071	85.5353		71.972	117.82	87.7846
116												55.8242	98.6843		69.1401	116.116	75.2732
118												48.9196	93.3655		83.8781	121.792	59.6803
120
blue data points are excluded

## Sheet: C
Figure 4C
	N			P			FL			DC
	Mean	SEM	N	Mean	SEM	N	Mean	SEM	N	Mean	SEM	N
	0.2664	0.06342	321	0.01725	0.003391	396	0.006232	0.002031	420	0.01175	0.003338	150

## Sheet: D
Figure 4D
	N			P			FL			DC
	Mean	SEM	N	Mean	SEM	N	Mean	SEM	N	Mean	SEM	N
	73.95	3.467	321	89.71	9.034	396	38.25	6.64	420	72.93	7.154	150
