# Supplementary material for: MAP7 regulates axon morphogenesis by recruiting kinesin-1 to microtubules and modulating organelle transport
Source: eLife journal article supplement (doi:10.7554/elife.36374), 2018-08-22
Supplement: supp [file elife_poa_e36374_Figure_5_source_data_1.xlsx]

## Sheet: B
Figure 5B
distance (um)	KIF5C (MAP7)	KIF5C (mCherry)
0	16.6667	23.9778
0.0648	18.3794	23.5157
0.1296	20.4174	22.3269
0.1944	20.6976	22.0749
0.2592	17.3227	22.5839
0.324	11.2308	22.4201
0.3888	10.6465	21.6612
0.4536	9.7579	21.9717
0.5184	10.101	22.1292
0.5832	10.0869	21.6117
0.648	10.9454	21.835
0.7128	12.523	21.3753
0.7776	14.1127	22.2612
0.8424	14.731	21.8597
0.9072	10.8537	20.1548
0.972	8.44	18.5274
1.0368	9.5707	18.7802
1.1016	9.3205	19.2932
1.1664	7.4507	20.7756
1.2312	7.5309	22.6508
1.296	10.6582	24.2571
1.3608	9.9036	23.5932
1.4256	11.1836	21.651
1.4904	14.2061	19.995
1.5552	20.2457	17.6385
1.62	25.0484	17.1
1.6848	26.9796	16.7534
1.7496	20.2484	16.653
1.8144	15.5814	17.4945
1.8792	11.939	18.0489
1.944	9.4636	18.9132
2.0088	10.8749	20.1199
2.0736	14.3043	20.9114
2.1384	20.6913	20.3696
2.2032	29.1335	19.6723
2.268	35.3353	19.1804
2.3328	36.5478	17.9676
2.3976	32.6667	18.3527
2.4624	26.1697	18.0041
2.5272	19.637	18.7024
2.592	17.6035	18.565
2.6568	21.8468	17.8676
2.7216	26.2542	18.7192
2.7864	28.2027	20.2851
2.8512	28.5547	21.7758
2.916	24.8919	22.0257
2.9808	19.4951	22.4956
3.0456	15.1441	22.6539
3.1104	12.6119	21.6125
3.1752	10.7119	20.6624
3.24	10.1623	20.6311
3.3048	9.9898	19.9973
3.3696	10.3227	18.0064
3.4344	11.3572	17.4128
3.4992	12.2011	17.3607
3.564	13.2585	16.4627
3.6288	16.0799	16.4849
3.6936	20.6728	16.6021
3.7584	23.1855	16.2274
3.8232	24.1845	16.2676
3.888	24.494	16.7846
3.9528	22.9393	17.4005
4.0176	19.0912	15.784
4.0824	16.475	15.4613
4.1472	14.9298	15.5705
4.212	12.7882	14.5562
4.2768	11.7283	14.8616
4.3416	12.2185	14.9804
4.4064	13.1046	14.6712
4.4712	13.3684	13.5842
4.536	14.3892	14.6222
4.6008	18.216	16.1461
4.6656	22.9713	16.2572
4.7304	30.7559

## Sheet: C
Figure 5C
mCherry	FL-mCherry
1.22	2.09
1.41	1.74
1.16	2.86
1.28	2.07
1.12	2.55
	2.19
