# Supplementary material for: MAP7 regulates axon morphogenesis by recruiting kinesin-1 to microtubules and modulating organelle transport
Source: eLife journal article supplement (doi:10.7554/elife.36374), 2018-08-22
Supplement: supp [file elife_poa_e36374_Figure_6_source_data_1.xlsx]

## Sheet: D
Figure 6D
time (s)	1-560							335-560							MAP7 alone
0	0	0	0	0	0	0	0
4	10.2966	18.789	38.2655	15.156	9.80044	26.9847	5.26351
8	14.5427	32.0922	57.2086	31.8586	16.9086	38.7415	6.06594
12	22.7743	47.7637	69.4313	43.7283	31.8797	49.3641	15.2327
16	23.8745	49.6557	70.8801	51.9027	15.6671	70.0997	14.2569
20	25.5888	49.6494	79.7432	72.1731	33.7507	55.3181	13.4158
24	28.2486	62.3495	80.9133	69.8688	32.6091	58.3944	17.2307
28	27.5237	56.9163	82.0937	90.4468	34.099	93.0627	27.6787
32	30.0757	51.7154	84.1272	78.7679	27.2069	48.9807	19.9015
36	33.4252	51.4639	89.5071	82.1013	53.4666	68.7086	21.0619
40	39.5554	54.3769	82.7955	94.4855	46.7308	83.1422	23.1804
44	33.2621	39.3561	85.1552	92.8139	49.3549	76.6924	29.1935
48	37.5594	43.1277	88.2996	83.282	49.3954	72.647	21.2263
52	41.4807	51.2445	83.1477	88.596	57.26	108.448	28.6405
56	48.6099	40.0527	85.5793	92.8379	29.6795	89.2812	30.8903
60	39.3279	41.9393	95.3904	92.584	38.9316	67.5129	28.3371
64	50.6126	52.0279	92.5687	87.2621	37.491	74.8454	29.38
68	50.8304	50.4593	85.8304	90.9922	32.1601	84.6358	33.0531
72	51.0225	54.7241	83.792	83.3845	24.9853	87.6764	35.8741
76	54.9169	58.086	93.2996	76.451	44.9977	66.1662	31.419
80	59.1852	63.2905	86.221	71.4668	30.192	84.3566	31.7988
84	48.4149	53.7222	93.0135	67.9175	35.474	67.9217	36.1846
88	57.4264	62.49	87.8555	67.2856	36.4749	79.5174	43.1112
92	52.1208	62.9515	82.5244	72.0375	36.723	83.7251	46.1216
96	52.7329	60.2341	86.7126	73.8165	36.735	81.4253	33.7319
100	50.5381	62.4239	96.3272	85.4403	60.3281	65.6206	48.7081
								335-560							MAP7 alone
0								0	0	0	0	0	0	0
3								38.2398	20.6268	35.871	34.3557	6.96783	25.9253	21.7631
6								45.0853	34.2322	49.0895	47.3631	12.6457	42.1172	11.5621
9								49.337	36.1317	54.787	50.9862	17.6541	45.0013	40.8907
12								59.8852	39.01	60.8115	53.2281	21.4744	63.3533	59.0381
15								52.3559	39.8438	60.9644	55.2555	24.6525	64.3624	34.9143
18								54.8131	43.7751	62.3036	60.3445	29.8093	55.6143	53.0938
21								60.3802	43.7215	64.5268	60.0209	32.2016	59.3817	49.1037
24								53.2509	45.4798	66.3928	61.9684	34.4735	61.0808	32.9097
27								56.1604	42.9657	64.9453	65.7397	37.9605	57.9281	26.5422
30								48.0387	44.0963	66.408	69.3803	41.4759	51.6731	47.6296
33								62.6635	45.649	70.3242	66.4864	43.0134	55.7959	36.0038
36								55.363	44.6747	66.5574	63.9959	45.3866	55.0347	29.6152
39								55.3589	44.4246	65.079	63.9983	46.5312	57.2604	56.9413
42								56.3776	46.3207	67.2339	65.5619	47.7092	53.4282	56.2955
45								55.9109	46.6344	69.6193	66.0575	50.1976	56.0199	32.3803
48								48.2441	48.6833	68.2635	69.8529	51.8133	65.9021	34.5234
51								43.8805	49.1085	68.844	72.9585	52.3194	54.995	57.5399
54								31.9	50.8757	66.0209	74.1635	54.68	56.0924	55.897
57								35.5049	51.0359	70.2456	76.367	58.398	64.8661	32.2171
60								31.8764	50.8918	69.6746	84.937	56.6946	69.9452	38.5585
63								26.7319	53.8054	69.4496	71.3234	60.7032	61.7276	73.6716
66								38.8783	55.2783	68.0717	66.8958	62.0823	43.1744	79.4735
69								36.0969	54.671	67.5258	78.2793	60.298	32.2932	53.4046
72								44.0567	56.0696	68.2754	83.9816	61.8168	37.4596	36.2976
75								49.7981	53.7232	69.8542	94.7029	66.1842	38.6337	65.0446
78								56.7461	53.8291	68.8074	104.233	68.8838	41.5234	37.3208
81								35.5119	54.3203	70.4772	114.461	68.7937	44.9688	33.694
84								46.8577	52.2505	70.2948	114.187	66.6855	38.2497	27.7919
87								43.0872	50.2375	71.0375	110.913	71.0936	25.5124	32.9616
90								75.5284	51.449	69.1551	107.117	69.58	31.6121	53.2169
93								83.445	52.0963	70.3766	119.44	68.0795	46.0023	26.4652
96								84.9308	49.774	70.4701	128.316	69.934	43.0138	22.3896
99								73.2568	51.8738	71.9737	133.305	76.3564	49.7546	40.3197
															MAP7 alone
0															0	0	0	0	0	0	0
5															0.508286	-0.92981	0.116326	1.58891	0.208863	7.40997	1.05357
10															-1.61739	-1.36336	-0.12726	-2.63473	0.184553	12.4977	2.04163
15															0.529694	-0.6508	-0.07816	0.434556	-0.09439	16.5565	1.76666
20															-0.23437	-0.61654	-0.28027	-2.00966	0.359266	20.1583	3.78157
25															-0.34593	-0.67377	-0.34509	-2.26174	0.23791	23.0923	4.75025
30															-0.62355	-0.8604	-0.24708	-2.75295	0.579683	27.7817	4.00181
35															-3.14369	-2.066	-0.30565	0.877544	-0.70118	29.6267	5.34477
40															-2.2554	-1.29409	-0.24977	-0.43003	-0.11686	31.089	5.5501
45															-3.56341	-1.27615	-0.54094	-3.14587	0.047534	34.1202	4.74474
50															-2.45449	-2.08619	-0.27435	0.092296	0.357694	37.4382	9.17177
55															-3.42796	-1.3644	-0.41801	1.48621	0.788521	38.3747	5.9226
60															-4.10333	-2.02027	-0.47771	-3.66613	0.661849	40.7683	6.93187
65															-1.82957	-0.46945	-0.41473	-2.0828	0.525634	42.0361	5.92925
70															-4.1173	-1.05972	-0.50244	-3.51126	0.580071	43.5348	5.72636
75															-5.11818	-0.23091	0.01626	1.04333	0.759373	45.4446	9.08055
80															-2.88331	-0.41837	-0.12827	-0.21942	0.26275	46.5897	7.98838
85															-2.84301	-0.80485	-0.00173	-0.87105	-0.43759	48.0707	6.48441
90															-4.13059	1.80045	-0.0157	-4.71239	-0.29452	50.7674	7.22161
95															-3.34898	0.334153	0.10363	0.34574	-0.33521	53.691	12.9906
100															-4.05221	-0.37396	-0.13995	-0.9095	-0.20971	52.7436	11.4616

## Sheet: E
Figure 6E
	1-560			335-560
	mean	sem	n	mean	sem	n
	0.07734	0.01423	182	0.1392	0.02269	238

## Sheet: F
Figure 6F
	1-560			335-560
	mean	sem	n	mean	sem	n
	61	2.2	182	60	1	238
