# Supplementary material for: MAP7 regulates axon morphogenesis by recruiting kinesin-1 to microtubules and modulating organelle transport
Source: eLife journal article supplement (doi:10.7554/elife.36374), 2018-08-22
Supplement: supp [file elife_poa_e36374_Figure_7_source_data_1.xlsx]

## Sheet: E
Figure 7E
Ctrl	MAP7	DC
0.758702	0.774927	0.771155
1.07425	0.551655	0.940923
0.829442	0.564337	0.776931
0.662282	0.680458	0.722489
0.822238	0.423821	0.470828
0.791434	0.737671	0.432514
	0.662303	0.563814
		0.57043
		0.541827
0.412063	0.282791
0.384129	0.326787
0.592432	0.191027
	0.309956

## Sheet: F
Figure 7F
Ctrl	MAP7	DC
2.66066	3.38559
2.78302	8.07554	1.83443
	5.52216	1.28205
3.99768	5.84961	2.22966
4.58176	5.02401	1.89846
		0.988052
		3.35491
		5.31799
		3.35393
2.29005	2.28083
3.63079	2.98199
2.15623	3.64281
2.88947	6.24653

## Sheet: G
Figure 7G
Ctrl	MAP7	DC
1.42	1.22	0.5
0.937	3.307	0.5
2	2.33	2.33333
1.533	2.857	0.666667
1.916	3	1.4
		1
		0.875
		1
		0.5
1	1.7
1.33	2.6
0.83	3.2
1.57	1.1

## Sheet: H
Figure 7H
Ctrl	MAP7	DC
0.329632	0.26596	0.2487
0.276669	0.323488	0.303537
0.29424	0.199966	0.351071
0.303211	0.326918	0.318143
0.349179	0.458414	0.294471
0.309815	0.218057	0.3188
0.478519	0.229961

## Sheet: I
Figure 7I
Ctrl	MAP7	DC
0.0258546	0.0309483	0.0279696
0.0132516	0.0335844	0.0176622
0.0192606	0.0368516	0.0362278
0.02898	0.0328673	0.0328891
0.0182772	0.0606362	0.0306153
0.0292811	0.0332271	0.0201956
0.00295508	0.0301018

## Sheet: J
Figure 7J
Ctrl	MAP7	DC
1.42	1.83	1
0.33	2.66	0.66
0.166	1.83
1.12	1.8	0.83
0.16	1.7	0.57
0.22	1.42	1
