# Supplementary material for: MAP7 regulates axon morphogenesis by recruiting kinesin-1 to microtubules and modulating organelle transport
Source: eLife journal article supplement (doi:10.7554/elife.36374), 2018-08-22
Supplement: supp [file elife_poa_e36374_Figure_8_figure_supplement_2_source_data_1.xlsx]

## Sheet: sheet
Figure 8 - figure supplement 2
RUN SPEED						SWITCHING FREQUENCY
Ctrl	FL	DC				Ctrl	FL	DC
0.289738	0.46823	0.357651				1.91424	3.30324	2.32183
0.286558	0.388617	0.307493				0.629366	3.2376	0
0.212297	0.235557	0.631494				1.85658	1.05086	0.378119
0.410261	0.25829	0.595451				0.368849	2.71887	0
0.26814	0.706441	0.286321				0.566027	2.77418	0
0.193577	0.388634	0.237115				1.16424	3.46184	0
0.542107	0.407953	0.449212				0.529418	4.69456	0
0.579654	0.583955	0.588773				3.0508	3.73975	0.308008
		0.318022						0.879409
		0.397221						0
		0.186468						0
		0.248713						0
		0.255593						0.786592
		0.235103						0.835299
		0.556427						0
		0.110587						2.92683
		0.31717						0
		0.459751						2.62974
