# Supplementary material for: MAP7 regulates axon morphogenesis by recruiting kinesin-1 to microtubules and modulating organelle transport
Source: eLife journal article supplement (doi:10.7554/elife.36374), 2018-08-22
Supplement: supp [file elife_poa_e36374_Figure_8_source_data_1.xlsx]

## Sheet: D
Figure 8D
RUN SPEED						SWITCHING FREQUENCY
Ctrl	MAP7	DC				Ctrl	MAP7	DC
1.26931	0.446507	0.293468				1.33367	4.34052	0
0.961646	0.356385	0.500705				1.32357	2.22378	0
0.503275	0.373715	0.476226				1.28593	2.96802	0.532875
0.774091	0.283745	0.285864				0.909091	0.84906	0
0.347905	0.374496	0.479962				0	1.2171	1.2766
0.430081	0.309608	0.597753				0.989011	2.40384	0
0.463971		0.360073				1.85859		0.953923
		0.500601						0
		0.546188						0
		0.129074						0.2693
		0.437928						1.07143
		0.174701						0.228311
		0.354955						3.0206
		0.274639						0.464474
		0.564461						0.983143
		0.290933						1.49555
		0.420572						2.4777
								1.0929
0.39445	0.120183
0.336902	0.585533
0.567546	0.379401					1.77341	0.90204
0.27857	0.384882					1.66925	3.27408
0.412099	0.314883					0.742574	2.83464
0.441977						0.59721	3.17142
0.729224						2.06285	2.02572
0.348796						2.85252
						0.27027
						1.54944

## Sheet: E
Figure 8E
RUN SPEED						SWITCHING FREQUENCY
Ctrl	MAP7	DC				Ctrl	MAP7	DC
0.36156	0.35907	0.712461				2.82317	1.24301	4.08163
0.607993	0.27757	0.262887				1.10141	2.41541	2.44717
0.46528	0.276561	0.322286				0	1.3647	3.46712
0.322198	0.556038	0.765375				0	1.67194	1.15385
0.972092	0.552829	0.420154				0	2.83554	1.1583
0.283261	0.279773	0.208918				0.904978	2.71739	1.5029
0.323008	0.413469	0.227381				1.2	2.3694	0.441176
0.422592	0.569973	0.281703				0	2	0
0.277568	0.3399	0.297459				1.48515	0.520833	0
0.826316	0.322467	0.248997				0	1.83171	2.06788
0.471993	0.369117	0.274399				1.04846	2.80186	0.920245
0.27788	0.232767					1.12385	1.82343
0.630869	0.219581					0.833333	2.42591
0.393216	0.379045					0.964784	1.64887
0.363877	0.459964					0.545455	2.08244
0.351886	0.584646					0.818182	3.26767
0.416805	0.388689					0.824176	0
	0.571809						2.31941
	0.457054						5.09892

## Sheet: F
Figure 8F
RUN SPEED						SWITCHING FREQUENCY
EGFP	MAP7	DC				EGFP	MAP7	DC
0.315032	0.469811	0.44588				0.517241	1.61867	0.530035
0.195286	0.570314	0.4396				1.68677	1.36364	0
0.417853	0.124934	0.391581				2.13211	0.443787	1.08089
0.27385	0.55518	0.252605				0.974787	1.52517	0
0.106496	0.314626	0.391347				1.15651	2.66306	2.01017
0.145855	0.288704	0.57429				0	1.51994	0
0.20839	0.577108	0.349018				0.767395	3.16623	0.83825
0.485443	0.409822	0.279487				1.38568	0.921942	0
0.239678	0.254449	0.38222				0	2.25564	1.875
0.211749	0.210131	0.160843				0.9375	1.39234	0.867052
0.42562	0.315673	0.170652				1.06791	1.59146	1.10106
0.335037	0.48869	0.475338				1	4.91803	0.994704
0.258337	0.357871	0.673935				0.819672	2.86396
0.282801	0.33713	0.219213				0.343249	2.8777
0.273616	0.218884					1.76471	0.795756
0.397659	0.135425					0	1.98879
0.348645	0.536329					1.6366	1.8961
0.369706	0.574673					0.990214	2.95851
0.250108	0.173961					1.83694	1.65289
0.266487	0.108857					1.12782	1.82002
0.559978	0.374777					0	2.57511
0.269238						0.817439
						0.473186
						2.07613

## Sheet: G
Figure 8G
RUN SPEED						SWITCHING FREQUENCY
EGFP	MAP7	DC				EGFP	MAP7	DC
0.648351	0.187304	0.288613				2.44186	1.45253	0
0.482963	0.398001	0.308003				1.12742	2.35729	2.72727
0.343942	0.460663	0.444171				0	2.21543	1.76551
0.591641	0.611167	0.242923				1.51849	1.85122	0.652174
0.433995	0.213655	0.330015				1.5544	1.875	1.09489
0.218607	0.3478	0.233682				1.32743	1.08025	3.07692
0.29476	0.126838	0.809429				1.3363	0.726392	2.35294
0.356658	0.3089	0.357231				0.603622	1.23711	1.08108
0.482272	0.465166					1.10294	1.13636
0.802949	0.264341					2.25631	1.21951
0.157559	0.167186					1.28112	1.22449
0.278179	0.240403					1.5	1.90996
0.342184	0.388868					0.365854	5.02255
0.205861	0.283529					1.69865	4.06025
0.222019						1.16505
0.442456	0.228536	0.399613				0.492382	2.0202	0.454545
0.274743	0.222109	0.378274				0.987405	1.01351	1.35969
0.199916	0.26168	0.40393				0.837989	0	0.632911
0.41428	0.208271	0.240416				1.96078	2.61628	2.14286
0.410085	0.54675	0.540357				2.75652	1.20773	0
0.248303	0.309768	0.24786				1.20482	1.45888	0
0.625927	0.290294	0.137837				1.18577	0.757576	1.40187
0.55079	0.267459	0.155547				0.479233	1.83836	0.882353
0.619776	0.217314	0.118788				0	1.14933	0
0.365351	0.375012	0.381368				0.647948	0.997722	0.352113
0.328605	0.802309					0	2.19449
0.48059	0.312171					0.753769	0.91434
